# Supplementary material
Source: MDPI journal article supplement (https://www.mdpi.com/2073-4441/10/3/302)
Supplement: s1 [file s1]

|  |  |  |  | **Montmorillonite** | | | | | | | | | | |  | **Vermiculite** | | | | | | | | | | | |
| --- | --- | --- | --- | --- | --- | --- | --- | --- | --- | --- | --- | --- | --- | --- | --- | --- | --- | --- | --- | --- | --- | --- | --- | --- | --- | --- | --- |
|  |  |  |  | **Erosion (mm)** | | | |  | **Shear Stress (Pa)** | | | |  | **Zeta** |  | **Erosion (mm)** | | | |  | **Shear Stress (Pa)** | | | |  | **Zeta** | |
| **Temp** | **pH** | **NaCl** | **Rep.** | **Setting #** | | | |  | **Setting #** | | | |  | **Potential** |  | **Setting #** | | | |  | **Setting #** | | | |  | **Potential** | |
| **OC** | **mg/l** | **1** | **2** | **3** | **4** |  | **1** | **2** | **3** | **4** |  | **(mV)** |  | **1** | **2** | **3** | **4** |  | **1** | **2** | **3** | **4** |  | **(mV)** |
| 10 | 6 | 5 | R1 | 0 | 0 | 32 | -- |  | 0.24 | 0.59 | 5.22 | -- |  | -8.3 |  | 0 | 1 | 11 | -- |  | 0.20 | 0.63 | 0.20 | -- |  | -10.4 |
| R2 | 0 | 2 | 15 | -- |  | 0.25 | 0.62 | 3.91 | -- |  | -8.2 |  | 1 | 4 | 10 | -- |  | 0.14 | 0.77 | 0.14 | -- |  | -8.6 |
| R3 | 0 | 5 | 25 | -- |  | 0.22 | 0.54 | 4.5 | -- |  | -8.1 |  | 0 | 0 | 15 | -- |  | 0.13 | 0.60 | 0.13 | -- |  | -8.6 |
| 5000 | R1 | 1 | 11 | 25 | -- |  | 0.22 | 0.51 | 4.98 | -- |  | -19.4 |  | 0 | 1 | 5 | 10 |  | 0.21 | 0.46 | 2.45 | 11.11 |  |  |
| R2 | 0 | 14 | 20 | -- |  | 0.24 | 0.49 | 3.54 | -- |  | -19.9 |  | 0 | 1 | 6 | 12 |  | 0.23 | 0.51 | 2.65 | 10.89 |  |  |
| R3 | 1 | 17 | 19 | -- |  | 0.2 | 0.53 | 4.5 | -- |  | -14.4 |  | 0 | 1 | 8 | 17 |  | 0.2 | 0.48 | 2.85 | 11.59 |  |  |
| 8 | 5 | R1 | 0 | 0 | 1 | 22 |  | 0.23 | 0.79 | 3.72 | 15.32 |  | -8.6 |  | 0 | 0 | 0 | 0 |  | 0.22 | 0.48 | 4.06 | 10.19 |  | -10.3 |
| R2 | 0 | 0 | 1 | 29 |  | 0.28 | 0.58 | 6.51 | 11.08 |  | -9.1 |  | 4 | 2 | 2 | 11 |  | 0.27 | 0.79 | 4.37 | 9.82 |  | -10.2 |
| R3 | 3 | 1 | 1 | 14 |  | 0.20 | 0.62 | 3.40 | 9.78 |  | -8.8 |  | 0 | 0 | 2 | 5 |  | 0.19 | 0.5 | 3.14 | 10.32 |  | -10.4 |
| 5000 | R1 | 2 | 2 | 30 | -- |  | 0.18 | 0.46 | 6.19 | -- |  | -21.8 |  | 1 | 1 | 0 | 13 |  | 0.18 | 0.44 | 3.55 | 10.69 |  | -17.5 |
| R2 | 1 | 16 | 23 | -- |  | 0.21 | 0.48 | 3.21 | -- |  | -22 |  | 0 | 2 | 8 | 18 |  | 0.22 | 0.41 | 2.74 | 11.27 |  | -17.7 |
| R3 | 2 | 21 | 20 | -- |  | 0.19 | 0.40 | 4.72 | -- |  | -21.1 |  | 1 | 1 | 3 | 15 |  | 0.21 | 0.45 | 2.31 | 11.62 |  | -17.6 |
| 20 | 6 | 5 | R1 | 17 | 19 | -- | -- |  | 0.28 | 0.89 | -- | -- |  | -7.1 |  | 2 | 20 | -- | -- |  | 0.34 | 0.90 | -- | -- |  | -19 |
| R2 | 7 | 35 | -- | -- |  | 0.15 | 1.09 | -- | -- |  | -17 |  | 15 | 20 | -- | -- |  | 0.34 | 0.59 | -- | -- |  | -18.5 |
| R3 | 4 | 26 | -- | -- |  | 0.22 | 0.77 | -- | -- |  | -13.7 |  | 9 | 29 | -- | -- |  | 0.18 | 0.59 | -- | -- |  | -20.7 |
| 5000 | R1 | 1 | 33 | -- | -- |  | 0.17 | 0.56 | -- | -- |  | -24.6 |  | 0 | 7 | 21 | -- |  | 0.19 | 0.49 | 5.65 | -- |  | -21.4 |
| R2 | 0 | 36 | -- | -- |  | 0.20 | 0.64 | -- | -- |  | -23.8 |  | 0 | 6 | 15 | -- |  | 0.19 | 0.38 | 4.98 | -- |  | -20.5 |
| R3 | 0 | 35 | -- | -- |  | 0.17 | 0.58 | -- | -- |  | -24.7 |  | 0 | 5 | 18 | -- |  | 0.15 | 0.38 | 5.21 | -- |  | -20.7 |
| 8 | 5 | R1 | 0 | 0 | 11 | 13 |  | 0.20 | 0.56 | 3.35 | 17.588 |  | -4.1 |  | 4.40 | 5 | 11 | 16 |  | 0.27 | 0.63 | 7.40 | 16.02 |  | -9.7 |
| R2 | 0 | 0 | 2 | 22 |  | 0.28 | 0.51 | 5.76 | 22.75 |  | -18 |  | 2 | 1 | 6 | 13 |  | 0.29 | 0.59 | 4.38 | 15.12 |  | -5.6 |
| R3 | 1 | 0 | 2 | 19 |  | 0.24 | 0.50 | 6.98 | 19.13 |  | -18.3 |  | 3 | 4 | 9 | 15 |  | 0.25 | 0.64 | 6.32 | 16.32 |  | -12.1 |
| 5000 | R1 | 2 | 35 | -- | -- |  | 0.17 | 0.47 | -- | -- |  | -24.3 |  | 3 | 11 | 25 | -- |  | 0.35 | 0.54 | 6.94 | -- |  | -4.4 |
| R2 | 5 | 28 | -- | -- |  | 0.27 | 0.66 | -- | -- |  | -23.7 |  | 2 | 13 | 11 | -- |  | 0.26 | 0.49 | 4.00 | -- |  | -22.3 |
| R3 | 2 | 35 | -- | -- |  | 0.17 | 0.64 | -- | -- |  | -23.6 |  | 1 | 15 | 18 | -- |  | 0.25 | 0.62 | 4.58---- | -- |  | -22.6 |
| 30 | 6 | 5 | R1 | 37 | -- | -- | -- |  | 0.11 | -- | -- | -- |  | -18.6 |  | 14 | 23 | -- | -- |  | 0.24 | 0.75 | -- | -- |  | -18.5 |
| R2 | 34 | -- | -- | -- |  | 0.29 | -- | -- | -- |  | -19.5 |  | 24 | 18 | -- | -- |  | 0.25 | 0.42 | -- | -- |  | -19.5 |
| R3 | 29 | -- | -- | -- |  | 0.19 | -- | -- | -- |  | -18.4 |  | 15 | 21 | -- | -- |  | 0.22 | 0.67 | -- | -- |  | -19.8 |
| 5000 | R1 | 5 | 26 | -- | -- |  | 0.11 | 0.59 | -- | -- |  | -22.1 |  | 3 | 30 | -- | -- |  | 0.21 | 0.54 | -- | -- |  | -20 |
| R2 | 6 | 24 | -- | -- |  | 0.16 | 0.55 | -- | -- |  | -24.1 |  | 4 | 23 | -- | -- |  | 0.29  .0 | 0.44 | -- | -- |  | -18.6 |
| R3 | 0 | 35 | -- | -- |  | 0.24 | 0.54---- | -- | -- |  | -24.1 |  | 0 | 37 | -- | -- |  | 0.14 | 0.46---- | -- | -- |  | -20.5 |
| 8 | 5 | R1 | 3 | 5 | 14 | -- |  | 0.28 | 0.45 | 6.52 | -- |  | -15.5 |  | 4 | 8 | 13 | -- |  | 0.14 | 0.57 | 6.23 | -- |  | -18.2 |
| R2 | 6 | 3 | 17 | -- |  | 0.22 | 0.56 | 5.10 | -- |  | -16.9 |  | 9 | 5 | 18 | -- |  | 0.32 | 0.72 | 5.57 | -- |  | -17.2 |
| R3 | 5 | 4 | 11 | -- |  | 0.26 | 0.52 | 6.22 | -- |  | -16.9 |  | 2 | 1 | 20 | -- |  | 0.10 | 0.43 | 4.74 | -- |  | -19.4 |
| 5000 | R1 | 35 | -- | -- | -- |  | 0.21 | -- | -- | -- |  | -25 |  | 5 | 24 | -- | -- |  | 0.20 | 0.59 | -- | -- |  | -23.3 |
| R2 | 41 | -- | -- | -- |  | 0.19 | -- | -- | -- |  | -23.5 |  | 2 | 25 | -- | -- |  | 0.18 | 0.39 | -- | -- |  | -23.6 |
| R3 | 40 | -- | -- | -- |  | 0.21 | -- | -- | -- |  | -24.2 |  | 20 | 19 | -- | -- |  | 0.26 | 0.51 | -- | -- |  | -23.1 |

Table S1. Erosion rates, shear stresses, and zeta potential for each erosion experiment for a montmorillonite-dominated and a vermiculite-dominated soil.
